# Supplementary material for: Can Dietary n-3 Polyunsaturated Fatty Acids Affect Apelin and Resolvin in Testis and Sperm of Male Rabbits?
Source: MDPI journal article supplement (doi:10.3390/molecules28176188), 2023-08-22
Supplement: s1 [file s1]

**Table S1.** Correlations (Pearson's coefficient) between all considered variables. Apelin, resolvin (Rv) D1, malondialdehyde (MDA), polyunsaturated acids (PUFA) n-3, n-6 of testis and semen, final testosterone (T), thiobarbituric reactive substances (TBARS), curvilinear velocity (VCL), motility and PUFAn-3 and n-6 intake (g/d)

|                    |      | Apelina testis |        |       | Resolvin testis |        |       | MDA testis |        |        | PUFAn-3 testis |        |        | PUFAn-6 testis |        |       | testosterone |        |        | TBARS sperm |        |        | PUFAn-3 sperm |        |       | PUFAn-6 sperm |        |       | VCL    |        |        | motility |        |        | PUFAn-3 intake_g/d |        |        | PUFAn-6 intake_g/d |        |        |
|--------------------|------|----------------|--------|-------|-----------------|--------|-------|------------|--------|--------|----------------|--------|--------|----------------|--------|-------|--------------|--------|--------|-------------|--------|--------|---------------|--------|-------|---------------|--------|-------|--------|--------|--------|----------|--------|--------|--------------------|--------|--------|--------------------|--------|--------|
|                    |      | CNT            | FLAX   | FISH  | CNT             | FLAX   | FISH  | CNT        | FLAX   | FISH   | CNT            | FLAX   | FISH   | CNT            | FLAX   | FISH  | CNT          | FLAX   | FISH   | CNT         | FLAX   | FISH   | CNT           | FLAX   | FISH  | CNT           | FLAX   | FISH  | CNT    | FLAX   | FISH   | CNT      | FLAX   | FISH   | CNT                | FLAX   | FISH   | CNT                | FLAX   | FISH   |
| Apelina testis     | Corr | 1              | 1      | 1     | .564            | -.847  | -.112 | -.138      | .250   | -.503  | .461           | -.028  | -.629  | -.727          | .007   | .464  | -.599        | .139   | -.854  | -.046       | -.771  | -.398  | .173          | .688   | .287  | .685          | -.308  | .691  | 0.655  | 0.715  | -.583  | 0.574    | -0.323 | -.227  | -0.380             | 0.397  | 0.697  | -0.380             | 0.397  | 0.697  |
|                    | Sign |                |        |       | .243            | .034   | .833  | .794       | .633   | .309   | .358           | .958   | .181   | .102           | .989   | .355  | .209         | .793   | .030   | .931        | .073   | .435   | .744          | .131   | .581  | .133          | .553   | .129  | 0.158  | 0.111  | .224   | 0.234    | 0.532  | .665   | 0.458              | 0.436  | 0.124  | 0.458              | 0.436  | 0.124  |
| Resolvin testis    | Corr | .564           | -.847  | -.112 | 1               | 1      | 1     | .158       | -.400  | -.256  | -.304          | -.475  | -.296  | -.707          | .379   | .118  | .163         | -.506  | -.313  | -.646       | .953   | -.237  | -.103         | -.818  | .358  | .282          | -.097  | .482  | -0.169 | -.864  | -.568  | 0.346    | 0.496  | -.144  | 0.058              | -0.109 | 0.322  | 0.058              | -0.109 | 0.322  |
|                    | Sign | .243           | .034   | .833  |                 |        |       | .765       | .432   | .625   | .558           | .341   | .570   | .116           | .458   | .824  | .758         | .306   | .546   | .166        | .003   | .651   | .845          | .047   | .486  | .588          | .855   | .333  | 0.749  | 0.027  | .239   | 0.502    | 0.317  | .786   | 0.912              | 0.837  | 0.534  | 0.912              | 0.837  | 0.534  |
| MDA testis         | Corr | -.138          | .250   | -.503 | .158            | -.400  | -.256 | 1          | 1      | 1      | .034           | .217   | .029   | -.154          | -.376  | -.562 | .012         | .233   | .496   | -.281       | -.205  | .732   | -.080         | .412   | -.479 | -.310         | .197   | -.231 | -0.121 | 0.617  | .281   | 0.220    | 0.152  | .827   | .926               | -.0273 | -0.662 | .926               | -.0273 | -0.662 |
|                    | Sign | .794           | .633   | .309  | .765            | .432   | .625  |            |        |        | .949           | .680   | .957   | .771           | .463   | .246  | .982         | .657   | .317   | .590        | .696   | .098   | .880          | .418   | .337  | .551          | .708   | .659  | 0.819  | 0.192  | .590   | 0.675    | 0.774  | .042   | 0.008              | 0.600  | 0.152  | 0.008              | 0.600  | 0.152  |
| PUFAn-3 testis     | Corr | .461           | -.028  | -.629 | -.304           | -.475  | -.296 | .034       | .217   | .029   | 1              | 1      | 1      | -.146          | -.829  | .167  | -.941        | .569   | .837   | .201        | -.548  | .392   | .170          | .521   | -.008 | .672          | .648   | -.697 | .951   | 0.432  | .541   | -0.007   | -0.601 | -.327  | -0.023             | -0.331 | -0.490 | -0.023             | -0.331 | -0.490 |
|                    | Sign | .358           | .958   | .181  | .558            | .341   | .570  | .949       | .680   | .957   |                |        |        | .783           | .041   | .752  | .005         | .238   | .037   | .702        | .260   | .443   | .748          | .290   | .988  | .143          | .164   | .124  | 0.003  | 0.392  | .268   | 0.989    | 0.207  | .528   | 0.965              | 0.521  | 0.323  | 0.965              | 0.521  | 0.323  |
| PUFAn-6 testis     | Corr | -.727          | .007   | .464  | -.707           | .379   | .118  | -.154      | -.376  | -.562  | -.146          | -.829  | .167   | 1              | 1      | 1     | .108         | -.086  | -.319  | .514        | .492   | .048   | .491          | -.363  | .794  | -.415         | -.217  | .489  | -0.340 | -0.259 | -.629  | -0.355   | 0.264  | -.729  | 0.053              | -0.073 | 0.285  | 0.053              | -0.073 | 0.285  |
|                    | Sign | .102           | .989   | .355  | .116            | .458   | .824  | .771       | .463   | .246   | .783           | .041   | .752   |                |        |       | .839         | .872   | .538   | .297        | .321   | .928   | .322          | .479   | .059  | .413          | .680   | .325  | 0.509  | 0.620  | .181   | 0.490    | 0.613  | .100   | 0.920              | 0.891  | 0.583  | 0.920              | 0.891  | 0.583  |
| testosterone       | Corr | -.599          | .139   | -.854 | .163            | -.506  | -.313 | .012       | .233   | .496   | -.941          | .569   | .837   | .108           | -.086  | -.319 | 1            | 1      | 1      | -.299       | -.400  | .594   | -.454         | .480   | -.439 | -.697         | .804   | -.782 | -.913  | 0.621  | .706   | -0.196   | -0.490 | .224   | 0.107              | -0.720 | -0.644 | 0.107              | -0.720 | -0.644 |
|                    | Sign | .209           | .793   | .030  | .758            | .306   | .546  | .982       | .657   | .317   | .005           | .238   | .037   | .839           | .872   | .538  |              |        |        | .565        | .432   | .214   | .366          | .335   | .384  | .124          | .054   | .066  | 0.011  | 0.189  | .117   | 0.710    | 0.323  | .670   | 0.840              | 0.106  | 0.168  | 0.840              | 0.106  | 0.168  |
| TBARS              | Corr | -.046          | -.771  | -.398 | -.646           | .953   | -.237 | -.281      | -.205  | .732   | .201           | -.548  | .392   | .514           | .492   | .048  | -.299        | -.400  | .594   | 1           | 1      | 1      | .584          | -.703  | -.186 | -.299         | .001   | -.052 | 0.225  | -0.688 | .004   | 0.407    | 0.490  | .462   | -0.421             | -0.279 | -0.483 | -0.421             | -0.279 | -0.483 |
|                    | Sign | .931           | .073   | .435  | .166            | .003   | .651  | .590       | .696   | .098   | .702           | .260   | .443   | .297           | .321   | .928  | .565         | .432   | .214   |             |        |        | .223          | .119   | .725  | .564          | .998   | .922  | 0.668  | 0.131  | .993   | 0.423    | 0.324  | .356   | 0.406              | 0.592  | 0.331  | 0.406              | 0.592  | 0.331  |
| PUFAn-3 sperm      | Corr | .173           | .688   | .287  | -.103           | -.818  | .358  | -.080      | .412   | -.479  | .170           | .521   | -.008  | .491           | -.363  | .794  | -.454        | .480   | -.439  | .584        | -.703  | -.186  | 1             | 1      | 1     | .060          | .368   | .418  | 0.107  | .928   | -.596  | 0.402    | -0.786 | -.761  | -0.126             | -0.170 | 0.002  | -0.126             | -0.170 | 0.002  |
|                    | Sign | .744           | .131   | .581  | .845            | .047   | .486  | .880       | .418   | .337   | .748           | .290   | .988   | .322           | .479   | .059  | .366         | .335   | .384   | .223        | .119   | .725   |               |        |       | .910          | .472   | .409  | 0.841  | 0.008  | .211   | 0.430    | 0.064  | .079   | 0.811              | 0.747  | 0.997  | 0.811              | 0.747  | 0.997  |
| PUFAn-6 sperm      | Corr | .685           | -.308  | .691  | .282            | -.097  | .482  | -.310      | .197   | -.231  | .672           | .648   | -.697  | -.415          | -.217  | .489  | -.697        | .804   | -.782  | -.299       | .001   | -.052  | .060          | .368   | .418  | 1             | 1      | 1     | 0.720  | 0.388  | -.968  | -0.169   | -0.543 | -.017  | -0.275             | -.921  | 0.624  | -0.275             | -.921  | 0.624  |
|                    | Sign | .133           | .553   | .129  | .588            | .855   | .333  | .551       | .708   | .659   | .143           | .164   | .124   | .413           | .680   | .325  | .124         | .054   | .066   | .564        | .998   | .922   | .910          | .472   | .409  |               |        |       | 0.107  | 0.447  | .002   | 0.748    | 0.265  | .974   | 0.598              | 0.009  | 0.186  | 0.598              | 0.009  | 0.186  |
| VCL                | Corr | 0.655          | 0.715  | -.583 | -0.169          | -.864  | -.568 | -0.121     | 0.617  | .281   | .951           | 0.432  | .541   | -0.340         | -0.259 | -.629 | -.913        | 0.621  | .706   | 0.225       | -0.688 | .004   | 0.107         | .928   | -.596 | 0.720         | 0.388  | -.968 | 1      | 1      | 1      | 0.149    | -0.569 | .180   | -0.252             | -0.282 | -0.523 | -0.252             | -0.282 | -0.523 |
|                    | Sign | 0.158          | 0.111  | .224  | 0.749           | 0.027  | .239  | 0.819      | 0.192  | .590   | 0.003          | 0.392  | .268   | 0.509          | 0.620  | .181  | 0.011        | 0.189  | .117   | 0.668       | 0.131  | .993   | 0.841         | 0.008  | .211  | 0.107         | 0.447  | .002  |        |        |        | 0.778    | 0.239  | .733   | 0.630              | 0.588  | 0.287  | 0.630              | 0.588  | 0.287  |
| motility           | Corr | 0.574          | -0.323 | -.227 | 0.346           | 0.496  | -.144 | 0.220      | 0.152  | .827   | -0.007         | -0.601 | -.327  | -0.355         | 0.264  | -.729 | -0.196       | -0.490 | .224   | 0.407       | 0.490  | .462   | 0.402         | -0.786 | -.761 | -0.169        | -0.543 | -.017 | 0.149  | -0.569 | .180   | 1        | 1      | 1      | -0.137             | 0.271  | -0.172 | -0.137             | 0.271  | -0.172 |
|                    | Sign | 0.234          | 0.532  | .665  | 0.502           | 0.317  | .786  | 0.675      | 0.774  | .042   | 0.989          | 0.207  | .528   | 0.490          | 0.613  | .100  | 0.710        | 0.323  | .670   | 0.423       | 0.324  | .356   | 0.430         | 0.064  | .079  | 0.748         | 0.265  | .974  | 0.778  | 0.239  | .733   |          |        |        | 0.796              | 0.603  | 0.745  | 0.796              | 0.603  | 0.745  |
| PUFAn-3 intake_g/d | Corr | -0.380         | 0.397  | 0.697 | 0.058           | -0.109 | 0.322 | .926       | -0.273 | -0.662 | -0.023         | -0.331 | -0.490 | 0.053          | -0.073 | 0.285 | 0.107        | -0.720 | -0.644 | -0.421      | -0.279 | -0.483 | -0.126        | -0.170 | 0.002 | -0.275        | -.921  | 0.624 | -0.252 | -0.282 | -0.523 | -0.137   | 0.271  | -0.172 | 1                  | 1      | 1      | 1.000              | 1.000  | 1.000  |
|                    | Sign | 0.458          | 0.436  | 0.124 | 0.912           | 0.837  | 0.534 | 0.008      | 0.600  | 0.152  | 0.965          | 0.521  | 0.323  | 0.920          | 0.891  | 0.583 | 0.840        | 0.106  | 0.168  | 0.406       | 0.592  | 0.331  | 0.811         | 0.747  | 0.997 | 0.598         | 0.009  | 0.186 | 0.630  | 0.588  | 0.287  | 0.796    | 0.603  | 0.745  |                    |        |        | 0.000              | 0.000  | 0.000  |
| PUFAn-6 intake_g/d | Corr | -0.380         | 0.397  | 0.697 | 0.058           | -0.109 | 0.322 | .926       | -0.273 | -0.662 | -0.023         | -0.331 | -0.490 | 0.053          | -0.073 | 0.285 | 0.107        | -0.720 | -0.644 | -0.421      | -0.279 | -0.483 | -0.126        | -0.170 | 0.002 | -0.275        | -.921  | 0.624 | -0.252 | -0.282 | -0.523 | -0.137   | 0.271  | -0.172 | 1.000              | 1.000  | 1.000  | 1                  | 1      | 1      |
|                    | Sign | 0.458          | 0.436  | 0.124 | 0.912           | 0.837  | 0.534 | 0.008      | 0.600  | 0.152  | 0.965          | 0.521  | 0.323  | 0.920          | 0.891  | 0.583 | 0.840        | 0.106  | 0.168  | 0.406       | 0.592  | 0.331  | 0.811         | 0.747  | 0.997 | 0.598         | 0.009  | 0.186 | 0.630  | 0.588  | 0.287  | 0.796    | 0.603  | 0.745  | 0.000              | 0.000  | 0.000  |                    |        |        |

\*. Correlation is significant at the 0.05 level (2-tailed).

\*\*. Correlation is significant at the 0.01 level (2-tailed).
